# Supplementary material
Source: Research Square preprint supplement (doi:10.21203/rs.3.rs-9794604/v1)
Supplement: Supplementary file 1 [file 8bd3ddc57dc5e89f94d19ba7.docx]

**Adaptive Technology Transmission for Climate-Resilient Agricultural Water Management: Integrating Hydrological Processes, Field Intelligence, and Policy Innovation**

**Dr Murari Lal Gaur**

Vice Chancellor, The Assam Kaziranga University, Jorhat, Assam, India
Former Vice Chancellor CVRU Bihar | Dean Anand Agril University Gujarat | Principal Scientist ICAR

***Email:***[*drmurari@kzu.ac.in*](mailto:drmurari@kzu.ac.in) *;* [*mlgaur07@gmail.com*](mailto:mlgaur07@gmail.com)LinkedIn***:*** [*www.linkedin.com/in/drmurarigaur*](http://www.linkedin.com/in/drmurarigaur)

**Highlights**

- Field-based hydrological intelligence complements structured datasets
- Adaptive Technology Transmission (ATT) reframes water management paradigms
- Micro-scale variability governs real-world water system performance
- Ground Intelligence (G-index) strengthens evidence beyond modelling
- Integrated hydrology–policy pathways enhance climate resilience
